## Single cell RNA sequencing reveals differential cell cycle activity in key cell populations during nephrogenesis

Abha S. Bais<sup>1+</sup>, Débora M. Cerqueira<sup>2,3+</sup>, Andrew Clugston<sup>1,2,3+</sup>,  
Jacqueline Ho<sup>2,3\*</sup> and Dennis Kostka<sup>1,4\*</sup>

<sup>1</sup>Department of Developmental Biology, University of Pittsburgh School of Medicine, Pittsburgh, PA, USA

<sup>2</sup>Rangos Research Center, UPMC Children's Hospital of Pittsburgh, Pittsburgh, PA, USA

<sup>3</sup>Department of Pediatrics, Division of Nephrology, University of Pittsburgh School of Medicine, PA, USA

<sup>4</sup>Department of Computational & Systems Biology and Pittsburgh Center for Evolutionary Biology and Medicine, University of Pittsburgh School of Medicine, Pittsburgh, PA, USA

+These authors contributed equally to this work.

### \*Co-Corresponding authors:

Dr. Dennis Kostka  
Rangos Research Center 8117  
Department of Developmental Biology  
530 45<sup>th</sup> St  
Pittsburgh, Pennsylvania 15224  
USA  
Phone: 412-692-9905  
Email: [kostka@pitt.edu](mailto:kostka@pitt.edu)

Dr. Jacqueline Ho  
Rangos Research Center 5127  
Department of Pediatrics  
530 45<sup>th</sup> St  
Pittsburgh, Pennsylvania 15224  
USA  
Phone: 412-692-5303  
Email: [jacqueline.ho2@chp.edu](mailto:jacqueline.ho2@chp.edu)

1 **ABSTRACT**

2       The kidney is a complex organ composed of more than 30 terminally differentiated  
3 cell types that all are required to perform its numerous homeostatic functions. Defects in  
4 kidney development are a significant cause of chronic kidney disease in children, which  
5 can lead to kidney failure that can only be treated by transplant or dialysis. A better un-  
6 derstanding of molecular mechanisms that drive kidney development is important for de-  
7 signing strategies to enhance renal repair and regeneration. In this study, we profiled  
8 gene expression in the developing mouse kidney at embryonic day 14.5 at single cell  
9 resolution. Consistent with previous studies, clusters with distinct transcriptional signa-  
10 tures clearly identify major compartments and cell types of the developing kidney. Cell  
11 cycle activity distinguishes between the “primed” and “self-renewing” sub-populations of  
12 nephron progenitors, with increased expression of the cell cycle related genes *Birc5*,  
13 *Cdca3*, *Smc2* and *Smc4* in “primed” nephron progenitors. Augmented *Birc5* expression  
14 was also detected in immature distal tubules and a sub-set of ureteric bud cells, suggest-  
15 ing that *Birc5* might be a novel key molecule required for early events of nephron pattern-  
16 ing and tubular fusion between the distal nephron and the collecting duct epithelia.

17 **KEY WORDS: Kidney development, single cell RNA sequencing, nephron differen-**  
18 **tiation, *Birc5***

## 1 INTRODUCTION

2 The mammalian kidney has evolved to provide critical adaptive regulatory mecha-  
3 nisms, such as the excretion of waste, and the maintenance of water, electrolyte and acid-  
4 base homeostasis to the body. These functions require the coordinate development of  
5 specific cell types within a precise three-dimensional pattern. Defects in kidney develop-  
6 ment are amongst the most common malformations at birth. Congenital anomalies of the  
7 kidney and urinary tract (CAKUTs) represent more than 20 percent of birth defects overall  
8 [1], and they account for a large fraction of chronic kidney disease and renal failure in  
9 children [2]. For example, the number of nephrons formed at birth is thought to be an  
10 important determinant of renal function, because reduced nephron numbers are often  
11 observed in humans with primary hypertension and chronic kidney disease [3, 4]. An es-  
12 timated 37 million people in the United States (~15% of the population) have chronic kid-  
13 ney disease (CKD) [5, 6] that can lead to kidney failure requiring transplant or dialysis.  
14 Development of strategies to enhance renal repair or regeneration are needed to reduce  
15 the morbidity and mortality associated with kidney disease, and they are dependent on a  
16 better understanding of the molecular genetic processes that govern kidney development.

17 Nephrons form the functional units of the kidney and are derived from a nephron  
18 progenitor (NP) cell population, also known as cap mesenchyme. These cells are capable  
19 of self-renewal, which is necessary to generate an appropriate number of nephrons during  
20 the course of embryogenesis and development. They are also multipotent, that is they  
21 have the ability to differentiate into the multiple cell types of the mature nephron [7, 8].  
22 More specifically, multipotent Cbp/P300-Interacting Transactivator 1 (Cited1)-positive/  
23 Sine Oculis Homeobox Homolog 2 (Six2)-positive nephron progenitors give rise to multi-  
24 ple nephron segments, and are termed “self-renewing” nephron progenitors [9]. The tran-  
25 sition of nephron progenitors into epithelialized structures is dictated by a series of tightly  
26 orchestrated signaling events. Of this, Bone morphogenetic protein 7 (Bmp7) induces the  
27 initial exit of Cited1<sup>+</sup>/Six2<sup>+</sup> cells into a Cited1<sup>-</sup>/Six2<sup>+</sup> state, which marks nephron progeni-  
28 tors “primed” for differentiation by ureteric bud-derived Wnt family member 9b (Wnt9b)/β-  
29 catenin signaling. Conversely, remaining Cited1<sup>+</sup>/Six2<sup>+</sup> nephron progenitors are kept in  
30 an undifferentiated and self-renewing state in response to Fibroblast growth factor 9  
31 (FGF9), Wnt and BMP7 signals [10-18].

1           Upon Wnt9b/ $\beta$ -catenin stimulation, nephron progenitors undergo a mesenchymal  
2 to epithelial transition to form pre-tubular aggregates, which then proceed to develop se-  
3 quentially into polarized epithelial renal vesicles, comma- and then S-shaped body struc-  
4 tures. Cells in the proximal portion of the S-shaped body differentiate into podocytes (glo-  
5 merular development), while its mid- and distal portions give rise to tubular segments of  
6 the nephron, which are subdivided into proximal tubules, loops of Henle and distal tubules  
7 [19], **Figure 1A**. During the S-shaped stage of glomerular development, developing po-  
8 docytes secrete vascular endothelial growth factor A (VEGF-A), which attracts invading  
9 endothelial cells into the cleft of the S-shaped body. Platelet-derived growth factor- $\beta$   
10 (PDGF $\beta$ ) signal produced by endothelial cells mediates the recruitment of mesangial  
11 cells, which invade the developing glomerulus and attach to the forming blood vessels.  
12 By the end of maturation, the glomerulus consists of four specified cell types: the fenest-  
13 rated endothelium, mesangial cells, podocytes and parietal epithelial cells of the Bow-  
14 man's capsule [20-24].

15           Single cell RNA sequencing (scRNA-seq) technology offers the ability to compre-  
16 hensively identify the transcriptional and (inferred) cellular composition of the developing  
17 kidney. Recent studies in developing mouse [25-30] and human kidneys [31-33] have  
18 contributed to our understanding of subpopulations of nephron progenitors and stromal  
19 cells, lineage fidelity, novel receptor-ligand pathways, and differences between mouse  
20 and human kidney development. scRNA-seq also has the potential to inform improve-  
21 ments in our ability to culture nephron progenitor cells [34-36] and produce higher-fidelity  
22 human kidney organoids [37, 38], and to develop novel strategies for enhancing renal  
23 repair and regeneration.

24           In this study, we used scRNA-seq to interrogate cell types and transcriptomes  
25 within 4,183 cells from one kidney pair of an E14.5 female mouse embryo. Clustering  
26 identified eleven clusters corresponding to the major components/cell-types of the devel-  
27 oping kidney and revealed expression of known lineage markers in unexpected cell types  
28 (e.g., renal stromal markers in nephron progenitors). Pseudotime analysis was utilized to  
29 describe transcriptional dynamics as nephron progenitors differentiate. Notably, we find  
30 that cell cycle activity distinguishes between the "primed" and "self-renewing" sub-popu-  
31 lations of nephron progenitors, with increased levels of the cell cycle related genes *Birc5*,

1 *Cdca3*, *Smc2* and *Smc4* in the “primed” sub-population. Moreover, increased *Birc5* ex-  
2 pression was also observed in immature distal tubules and in a sub-set of ureteric bud  
3 cells, suggesting its involvement in the process of fusion between the distal nephron and  
4 the collecting duct epithelia.

## 5 **RESULTS**

### 6 **Single cell gene expression identifies anatomical structures and cell lineages in** 7 **the developing kidney**

8 New nephrons are induced in response to signals from the ureteric bud throughout  
9 nephrogenesis until approximately postnatal day 3 in mice [39]. Thus, we chose to per-  
10 form scRNA-seq at embryonic day 14.5 (E14.5), a time point at which there is active  
11 nephron induction and varying degrees of nephron maturation, to comprehensively inter-  
12rogate single cell transcriptomes spanning different stages of differentiation during kidney  
13 development at mid-gestation. Using one kidney pair from an E14.5 female mouse em-  
14 bryo processed using the 10X Chromium platform and Illumina sequencing, our dataset  
15 consists of 4,183 high-quality kidney cells, with a median number of 2,789 genes detected  
16 per cell. Grouping cells into eleven clusters (see Methods) reveals major compo-  
17 nents/cell-types of the developing kidney (**Figure 1a-c, Supplemental Figure 1 and**  
18 **Supplemental Table 1**). Clusters and key markers are consistent with prior single cell  
19 analyses of the developing mouse kidney [25-29]. We observe clear separation of cells  
20 of the hematopoietic (*Cd52*, *Fcer1g*), ureteric bud/collecting duct (*Calb1*, *Gata3*), and en-  
21 dothelial (*Emcn*, *Kdr*) lineages from other cells of the developing kidney (nephron progen-  
22 itors, mixed/differentiating cells, podocytes, tubular cells and stromal cells). Stromal line-  
23 ages are marked by expression of *Col1a1* and *Meis1*, while cells derived from the neph-  
24 ron progenitor lineage express established marker genes associated with progressive  
25 stages of nephron differentiation. Thus, *Cited1* and *Six2* identify nephron progenitors,  
26 *Lhx1* and *Pax8* mark mixed/differentiating cells, *Fxyd2* and *Hnf4a* mark tubular cells, and  
27 podocytes are marked by *Podxl* and *Nphs1*.

28 Consistent with other reports, we identify three different stromal clusters: medullary  
29 stroma (*Col1a1*, *Meis1* and *Cldn11*), cortical stroma (*Col1a1*, *Meis1*, *Aldh1a2* and *Dlk1*)  
30 and mesangial stroma (*Col1a1*, *Meis1*, *Dlk1*, *Postn*) [25, 28]. Analyses of *in situ*

1 hybridization data at E14.5 from other reports, as well as GUDMAP (The GenitoUrinary  
2 Development Molecular Anatomy Project) and Eurexpress public resources facilitated  
3 identification and assignment of these clusters [27, 40-42].

4 Taken together, these results show that our scRNA-seq data successfully captured  
5 major cell types that are expected to be present in the developing kidney at E14.5, includ-  
6 ing progenitor cells and their derivatives as well as mature cell populations.

## 7 **Stratification of cell-types in the nephron progenitor lineage**

8 Next we focused on nephron progenitor cells and their descendant/derived cell  
9 types (mixed/differentiating, podocytes and tubular cells). Selecting those cell-types  
10 yielded 1,727 cells for further analysis. We are able to clearly distinguish between proxi-  
11 mal and distal tubular cells and podocytes, and pseudotime analysis allows us to assess  
12 the level of lineage commitment (**Figure 2a**). Nephron progenitor cells (marked by *Six2*  
13 and *Cited1* expression) clearly separate into two sub-groups, “self-renewing” and  
14 “primed” (**Figure 2b**), see below for more details. Mixed/differentiating cells express tran-  
15 scription factors like *Pax8* and *Lhx1*, which are associated with nephron development and  
16 encompass nephron progenitor cells differentiating into tubular cells and podocytes. We  
17 note heterogeneity in the mixed/differentiating cell cluster, which likely contains cells with  
18 different degrees of differentiation, like pre-tubular aggregate, renal vesicle, comma-, and  
19 S-shaped bodies. Pseudotime analysis on this sub-set of cells reconstructs three line-  
20 ages: differentiation into podocytes, and into proximal and distal tubular cells (**Supple-**  
21 **mental Figure 2**). This enabled us to distinguish between mature and immature podo-  
22 cytes and proximal/distal tubular cells (**Figure 2**, see **Methods**). Overall, our data clearly  
23 shows the major differentiation trajectories of nephron progenitor cells. For these three  
24 lineages, podocytes are marked by increasing expression of *Podxl* and *Nphs1* [43], prox-  
25 imal tubular cells by *Pdzk1* and *Slc34a1* [44], and distal tubular cells by *Tmem52b* and  
26 *Shd* [29] (**Supplemental Figure 3** shows a heatmap of genes with pronounced expres-  
27 sion differences during nephron progenitor cell differentiation and **Supplemental Table**  
28 **2** summarized differentially expressed genes).

## 29 **Transcriptional dynamics across nephron progenitor cell differentiation**

1 Cell cycle activity distinguishes between two different types of nephron progenitor cells

2 Comparing gene expression between “self-renewing” with “primed” NP cells  
3 yielded cell cycle as a main difference between the two types of nephron progenitor cells  
4 (**Figure 3, Supplemental Table 3**). We find that cell cycle-related genes like *Birc5*,  
5 *Cdca3*, *Smc2* and *Smc4* are up-regulated between “primed” and “self-renewing” nephron  
6 progenitor cells. Immunofluorescence analysis on kidney sections from E14.5 and P0  
7 mice indeed corroborates these observations, showing increased expression of *Birc5* in  
8 pre-tubular aggregates/renal vesicles but negligible or absent expression in the “self-re-  
9 newing” nephron progenitor cells (**Figure 3d** sub-panels  $\alpha$ ,  $\alpha'$ ,  $\beta$ ,  $\beta'$  and panel **3e**). These  
10 results corroborate previous findings that demonstrated that the committed nephron pro-  
11 genitor cells are more proliferative (=fast-cycling population) and more likely to differenti-  
12 ate than the slow-cycling, self-renewing NP population [45]. Next, comparing primed  
13 nephron progenitor cells with mixed/differentiating cells, we observe up-regulation of tran-  
14 scription factors associated with differentiation (*Lhx1*, *Pax8*), and down-regulation of  
15 nephron progenitor-associated genes like *Cited1*, *Six2*, *Eya1*, *Crym*, *Meis2*, *Rspo1* and  
16 others (**Figures 2b, 3a, 3e, Supplemental Table 4**). *In situ* hybridization analysis con-  
17 firms the expression of *Rspo1* [46] primarily in nephron progenitors (**Figure 3f**). Gene  
18 Ontology enrichment analysis comparing self-renewing with primed nephron progenitors,  
19 and primed progenitors with differentiating cells highlights differences in cell cycle-related  
20 biological processes between the two types of nephron progenitor cells and processes  
21 associated with differentiation between primed nephron progenitors and differentiating  
22 cells (**Figure 3b, c and Supplemental Table 5**).

23 To better understand these transcriptional changes occurring between self-renew-  
24 ing and primed nephron progenitor cells, we performed two additional types of gene set  
25 enrichment analyses utilizing lineage pseudotime annotation. Focusing on genes with  
26 changes across pseudotime (FWER < 0.01) we analyzed up-regulated and down-regu-  
27 lated genes separately. Performing enrichment analysis across Gene Ontology and Hall-  
28 mark gene sets from MSigDB [47, 48] yielded “EPITHELIAL\_MESENCHYMAL\_TRAN-  
29 SITION” (FDR-adjusted p-value: 6.2E-5) as the most enriched hallmark gene set for the  
30 down-regulated genes, while gene sets enriched for up-regulated genes included  
31 “E2F\_TARGETS” as the most enriched term as well as a multitude of gene sets



1 associated with cell cycle/replication (see **Supplemental Table 6**). We then used SCE-  
2 NIC [49] to gain some insight into gene regulation driving the transcriptional changes we  
3 observe across pseudotime between the two nephron progenitor cell types. **Figure 3g**  
4 depicts the activity of inferred regulatory modules across pseudotime for 31 recovered  
5 transcription factors. We observe three regulatory modules of down-regulated genes, at-  
6 tributed to the transcription factors *Egr1*, *Maf* and *Fos*. These findings corroborate previ-  
7 ous studies showing that these transcription factors are critical regulators of gene expres-  
8 sion, controlling transition from a pluripotent to differentiated state in nephron progenitor  
9 and human embryonic stem cells [50]. For up-regulated genes, we observe modules as-  
10 sociated with cell cycle-related transcription factors like *E2f8*, *Hcf1*, *Ezh2* and *Mybl2*,  
11 which have previously been implicated in specific aspects of cell cycle progression and  
12 cell fate decision in stem and progenitor cells [51-55]. Genes making up each module are  
13 provided in **Supplemental Table 8**.

#### 14 *Birc5* expression in the tubular interconnection zone

15 The cell cycle-related genes *Birc5*, *Ccnd1* and *Tuba1a* were up-regulated in im-  
16 mature distal tubules (**Figures 2b, 4a**). Immunostaining analysis confirmed augmented  
17 expression of *Birc5* and Cyclin D1 in the distal renal vesicle domain (**Figure 3d**). Interest-  
18 ingly, increased *Birc5* was also observed in a sub-set of ureteric bud cells (**Supplemental**  
19 **Figure 4** and **Figure 3d**) located in the region of interconnection between the late renal  
20 vesicle and the adjacent ureteric bud tips. The fusion between the nephron and the col-  
21 lecting system is required for the formation of a functional renal network. Studies in mouse  
22 models have demonstrated that this process is driven by preferential cell division within  
23 the distal renal vesicle domain [56]. Therefore, *Birc5* may contribute to tubular intercon-  
24 nection by regulating proliferation in the late renal vesicle and cell survival in the adjacent  
25 ureteric tip cells.

#### 26 Conserved features in mouse and human podocyte development

27 In the podocyte lineage, the genes most significantly defining the cluster are *Pax8*,  
28 *Podxl* and *Nphs1*. *Podxl* and *Nphs1* (in combination with *Synpo*, *Nphs2* and *VEGF-A*) are  
29 restricted to a sub-population of mature podocytes [28, 31, 57], which is consistent with



1 our observations (**Figures 2b and 4b**). In a sub-population of early podocytes, *WT1* and  
2 *Mafb* expression has been reported to overlap with the immature marker *Pax8* [27, 31],  
3 and is expressed in parietal epithelial cells [58], also consistent with our findings (**Figures**  
4 **2b and 4b**). For a summary of gene expression changes during podocyte development  
5 see **Supplemental Figure 5a** and **Supplemental Table 9**. Similar to previous scRNA-  
6 seq analysis in human fetal kidney [31], we observe enrichment in the PDZ domain pro-  
7 teins *Magi2*, *Slc9a3r2* and *Pard3b* in mature podocytes (**Figure 4b**). We also observe  
8 podocyte-specific activity of *Cldn5* (while the claudins *Cldn6* and *Cldn7* are expressed in  
9 tubular lineages, **Figure 4a**). Further on, the gene *Sparc* (a cystine-rich matrix-associated  
10 protein) and the Tissue-Type Plasminogen Activator *Plat* are expressed specifically in the  
11 podocyte lineage (as is *Robo2*, a gene known to be expressed and colocalized with  
12 nephrin on the basal surface of mouse podocytes [59], while the cell-cycle regulator *Gas1*  
13 (Growth Arrest Specific 1) is expressed in undifferentiated cells and mature podocytes,  
14 but less so in mature tubular cells (**Figure 4b**). Together, these findings further define the  
15 gene expression profile of the podocyte lineage, and they suggest substantial conserva-  
16 tion between mouse and human developing podocytes.

#### 17 Gene expression differences between proximal and distal tubular cells

18 In addition to their respective marker genes *Pdzk1*, *Slc34a1*, *Tmem52b* and *Shd*  
19 (see above), we observe that tubular lineages express the claudins *Cldn6* and *Cldn7*, as  
20 well as the Lymphocyte Antigen 6 Complex Locus A (*Ly6a*, aka *Sca-1*), see **Figure 4a**  
21 (**Supplemental Figure 5b** and **Supplemental Table 10** show additional genes with dif-  
22 ferential expression between proximal and distal tubular cells). *Ly6a* is a member of the  
23 murine L6 family and has been reported to mark cancer and tissue-resident stem cells in  
24 mice [60]; however there is no known direct human ortholog for *Ly6a*, and also the func-  
25 tion of the LU domain, which characterizes *Ly6a*'s superfamily of proteins, is currently  
26 unknown in humans [60].

27 We note that *Mep1a*, *Aldob* and *Tmem174* mark proximal tubular cells in our data  
28 (**Figure 4a**) and have been reported amongst the top-most down-regulated genes after  
29 *p53* conditional deletion in nephron progenitor cells [61]. Of the other three reported top  
30 down-regulated genes two (*Pck1* and *Cyp2d26*) also show proximal tubular cell specific

1 expression (data not shown), while *Reg8* expression was not detected in our data. This  
2 is in line with the observation of fewer proximal tubular cells in P0 mutant kidneys reported  
3 in [61]. With respect to the cell cycle, we find that Cyclin-Dependent Kinase Inhibitor 1 A  
4 (*Cdkn1a*, aka *P21*) is active specifically in proximal tubular cells, while Cyclin-Dependent  
5 Kinase Inhibitor 1 C (*Cdkn1c*, aka *P57*) is primarily expressed in podocytes (**Figures 4a**  
6 and **4b**). For distal tubular cells, we don't observe a selectively active kinase inhibitor but  
7 note that Cyclin-Dependent Kinase-like 1 (*Cdkl1*) is specifically expressed in this cell type.  
8 These findings pinpoint lineage-specific gene expression differences between the proxi-  
9 mal vs. distal tubular lineages, and they point towards lineage-specific control of the cell  
10 cycle across nephron progenitor differentiation.

11 Recently published scRNA-seq papers have described differences in gene expres-  
12 sion across a variety of proximal tubule transcripts and lncRNAs in different sexes in the  
13 adult mouse kidney [62, 63]. We observe that female-enriched markers, including  
14 *Gm4450*, *Lrp2*, *Sultd1*, *Aadat*, *Hao2* were highly expressed in our proximal tubular cluster,  
15 while most of the male-enriched markers (*Slc22a12*, *Cndp2*, *Cesf1*, etc.) were absent or  
16 expressed at low levels. This data suggests that sexually dimorphic gene expression in  
17 proximal tubule may occur at or before E14.5.

## 18 **Expression of known lineage-marker genes in unexpected cell types**

19 Expression of known lineage-marker genes in unexpected cell types has been re-  
20 ported based on the analysis of scRNA-seq data, for example that stromal cells express  
21 *Gdnf* [27]. Consistent with this report, we found that nephron progenitor markers (*Six2*,  
22 *Cited1*, *Crym*) are expressed in cells in the stromal cluster, and that stromal markers are  
23 present in the nephron progenitor cluster (*Meis1*, *Foxd1*, *Crabp1*). We also confirm that  
24 *Gdnf* is expressed in the stromal cluster (in addition to nephron progenitor cells), and that  
25 *Aldh1a2* RNA is present in stromal and nephron progenitor clusters (**Figure 5**).

26 We note that nephron progenitor marker genes are not homogeneously expressed  
27 across different stromal cell types. For instance, *Cited1* is detected (five or more reads)  
28 in about 7% of cortical stromal cells, but in less than 1% of other stromal cell types. We  
29 find similar enrichment (expression in ~7% vs less than 1% of cells) for *Six2* and *Crym* in  
30 cortical stroma, whereas *Gdnf* is more modestly enriched in cortical stroma (expressed in

1 ~3% vs less than 1% of cells, respectively). We next focused on cortical stroma and  
2 looked at co-expression of nephron progenitor and stromal marker genes in the same  
3 cells (binary expression “on” vs. “off”) and find significant positive association between  
4 the expression of stromal- and nephron-progenitor genes (Fisher exact test, **Table 1**).  
5 This analysis demonstrates widespread co-expression of nephron-progenitor and stromal  
6 markers in the same cortical/stromal cells, and on average we observe higher odds ratios  
7 of association for *Col1a1* expression with nephron progenitor lineage-markers, compared  
8 with *Meis1* (**Table 1**).

9 Further on, the cluster we identified as distal tubular cells contains cells with a  
10 distal-like expression profile, as characterized by the expression of *Tmem52b* and *Shd*  
11 [29]. However, despite the distinct lineage origins, cells from this cluster and from the  
12 ureteric\_bud/collecting\_duct cluster exhibit some transcriptional congruence [29, 64].  
13 Specifically, *Calb1*, *Wdfc2* and *Mal* [28], which are thought to mark the ureteric but line-  
14 age, and *Mecom* [63], which is thought to mark distal tubular cells, are expressed in a  
15 significant fraction of cells in both these clusters, but absent in proximal tubular cells (**Table 2**).

## 17 **DISCUSSION**

18 Over 30 terminally differentiated nephron cell types are required for the function of  
19 the mammalian kidney. The advent of scRNA-seq technology has made it possible to  
20 explore the cellular heterogeneity of the kidney and precisely identify the transcriptional  
21 signatures that define each of its cell types. In this study, we have performed scRNA-seq  
22 analysis of the developing mouse kidney at E14.5, a time point in which there is active  
23 nephron induction and varying degrees of nephron maturation. Major transcriptional clus-  
24 ters – corresponding to nephron progenitors, mixed/differentiating cells, podocytes, dif-  
25 ferentiated tubules (proximal and distal), ureteric epithelium, stroma (medullary, mesan-  
26 gial and cortical), hematopoietic and endothelial lineages – are identified within the whole  
27 kidney analysis, and are consistent with prior single cell analyses of the developing  
28 mouse kidney [25-27, 29]. We find that cell cycle activity distinguishes between “primed”  
29 and “self-renewing” sub-populations of nephron progenitors. Furthermore, augmented  
30 *BirC5* expression occurs in immature distal tubules and a sub-set of ureteric bud cells,

1 suggesting that *Birc5* might be a novel key molecule required for early events of tubular  
2 fusion between the distal nephron and the collecting duct epithelia.

3 All nephron segments derive from a multipotent self-renewing nephron progenitor  
4 population, which co-expresses the transcription factor *Six2* and the transcriptional acti-  
5 vator *Cited1*. Previous studies have identified two sub-types of nephron progenitors, with  
6 *Cited1*<sup>+</sup>/*Six2*<sup>+</sup> progenitors transitioning to a *Cited1*<sup>-</sup>/*Six2*<sup>+</sup> primed state as the nephrogen-  
7 esis proceeds [15, 34, 65]. Recent studies using time-lapse imaging and scRNA-seq anal-  
8 yses have indicated, however, that the nephron progenitor compartment is more hetero-  
9 geneous than initially supposed [26, 27, 29, 66-68]. Moreover, differences in cell cycle  
10 length within progenitors appear to play a role in the sub-compartmentalization of the  
11 progenitor population [45]. In agreement, our scRNA-seq analysis shows separation of  
12 nephron progenitor cells into a “self-renewing” and “primed” sub-population, both co-ex-  
13 pressing *Six2* and *Cited1*, but distinguished by higher cell cycle activity in the “primed”  
14 cells. Studies in mice have demonstrated that the committed nephron progenitors are  
15 more proliferative, exhibiting preferential exit from the cap mesenchyme compartment  
16 and differentiation into early nephrons [45]. Intriguingly, in the human renal cap mesen-  
17 chyme, the “self-renewing” nephron progenitors exhibit a greater proliferative activity,  
18 compared to the committed progenitor population [32]. Although it is still unclear what  
19 drives these species-specific differences, this may be related to unique transcription fac-  
20 tor expression in the human fetal kidney (such as continuous *Six1* expression in cap mes-  
21 enchyme throughout nephrogenesis) [32].

22 We find that the transcriptional profile of “primed” nephron progenitors represents  
23 an intermediate/transitional state between self-renewing NP and mixed/differentiating  
24 cells (pre-tubular aggregates/renal vesicles), with lower levels of *Cited1* and increased  
25 expression of early commitment markers like *Lhx1* and markers of renal epithelia like  
26 *Pax8*. These findings are consistent with previous scRNA-seq analyses of developing  
27 human and mouse kidneys [28, 69], but are in contrast to other studies on nephron pro-  
28 genitor subpopulations where *Cited1* expression seems to be turned off prior to the acti-  
29 vation of pre-tubular aggregate genes [15, 34, 68]. Such discrepancies might be due to  
30 differences in the technical sensitivity of the methods applied in each study (scRNA-seq  
31 versus immunofluorescence or *in situ* hybridization). They also highlight the importance

1 of further analysis to confirm whether these nephron progenitor sub-populations coincide  
2 with distinct spatial domains within the developing kidney.

3 Our approach successfully identified a number of cell types in the developing kid-  
4 ney. Consistent with previously reported expression patterns, we observe *Podxl*, *Synpo*,  
5 *Nphs1* and *Nphs2* expression in mature podocytes, whereas *WT1* and *Mabf* are also  
6 expressed in a sub-population of early podocytes [31, 57]. Indeed, we also observed sev-  
7 eral PDZ domain proteins (*Magi2*, *Slc9a3r2* and *Pard3b*) [31] expressed in human devel-  
8 oping podocytes in our data, suggesting that podocyte identity is conserved in the mouse  
9 and human developing kidney. Cells in the proximal tubular cluster are characterized by  
10 the specific expression of known proximal tubule markers, such as *Pdzk1* and *Slc34a1*  
11 [29, 63]. The scaffold protein Pdzk1 is essential for the proper localization of interacting  
12 proteins, such as the sodium-phosphate transporter NaPi-2a (encoded by *Slc34a1*), in  
13 the brush border of the proximal tubular cells [70-72]. Interestingly, mutations in *Slc34a1*  
14 have been linked to nephrocalcinosis and Fanconi renal tubular syndrome [73, 74]. Further  
15 on, we observe that *Cldn5* marks the podocyte lineage, while *Cldn6* and *Cldn7* are ex-  
16 pressed in mixed/differentiating cells and both tubular lineages, but absent in podocytes.  
17 Genes specifically expressed in distal tubular cells in our data include Galectin 3 (*Lgals3*),  
18 *Slc12a1* and the long non-coding RNA *Neat1*.

19 The formation of a fully functional nephron entails fusion between the late renal  
20 vesicle and the adjacent ureteric tip. An elegant study using 3D modeling of nephrons  
21 and *Six2-eGFP*Cre x *R26R-lacZ* mice demonstrated that this connecting segment of the  
22 nephron is derived from the cap mesenchyme (not the ureteric epithelium), and the pro-  
23 cess of fusion is likely driven by preferential cell division within the distal renal vesicle  
24 domain [56]. In line with this, our data identified augmented expression of cell cycle-re-  
25 lated molecules, such as Cyclin D1 (*Ccnd1*), *Birc5* and *Tuba1a*, in immature distal tu-  
26 bules. Interestingly, high *Birc5* expression was also detected in ureteric bud cells located  
27 in the region where the ureteric tip connects with the distal portion of the renal vesicle  
28 (see **Supplemental Figure 4**).

29 *Birc5* (also known as Survivin) has been implicated in a number of kidney condi-  
30 tions, including autosomal-dominant polycystic kidney disease, acute kidney injury and  
31 renal cell carcinomas [75-79], however its role in context of normal kidney development

1 is still unknown. In normal tissues, transcription of *Birc5* is tightly regulated in a cell cycle-  
2 dependent manner, reaching a peak in the G2/M phase [80-82], followed by a rapid de-  
3 cline at the G1 phase [83]. *Birc5* targets the chromosomal passenger complex (CPC) to  
4 the centromere, ultimately enabling proper chromosome segregation and cytokinesis [84-  
5 90]. *Birc5* also plays a role as an inhibitor of programmed cell death. Although this mech-  
6 anism is not completely understood, it seems to require cooperation with other molecules  
7 (such as XIAP and HBXIP) and results in inhibition of caspase-9 [91-94]. Our data sug-  
8 gest that *Birc5* might be a novel key molecule required for early events of nephron pat-  
9 terning and fusion, by regulating cell survival and/or proliferation in late renal vesicle and  
10 the adjacent ureteric tip.

11 In line with other scRNA-seq studies, we identify three stromal clusters in our da-  
12 taset: cortical, medullary and mesangial [25, 27]. The genes most significantly defining  
13 the mesangial stroma cluster are *Dlk1* and *Postn* [25, 29]. Cells in cortical stroma express  
14 high levels of *Aldh1a2* and *Dlk1*, while medullary stroma cluster contains cells with in-  
15 creased expression of *Cldn11*. The absence of an expression profile consistent with a  
16 loop of Henle signature in our scRNA-seq data is likely due to a low-abundance of these  
17 cell populations at E14.5 [95]. In addition, the lack of information on the cell diversity and  
18 identity within the loops of Henle continues to hinder the annotation of this segment [63].

19 In summary, this study provides an in-depth transcriptional profile of the developing  
20 mouse kidney at mid-gestation. Major main transcriptional clusters are identified, and are  
21 consistent with prior single cell analyses of the developing mouse kidney [25-27, 29].  
22 Notably, we find that cell cycle activity distinguishes between the “primed” and “self-re-  
23 newing” sub-populations of nephron progenitors, with increased levels of the cell cycle  
24 related genes *Birc5*, *Cdca3*, *Smc2* and *Smc4* in the “primed” sub-population. Finally,  
25 *BirC5* expression in immature distal tubules and ureteric bud cells may contribute to early  
26 events of tubular fusion between the distal nephron and the collecting duct epithelia.

## 27 **METHODS**

### 28 **Embryonic kidney collection and single-cell RNA sequencing**

29 Timed pregnant wild-type CD-1 female mice used in this study were obtained from  
30 Charles River Laboratories (Wilmington, MA, USA). The date on which the plug was



1 observed was considered embryonic day 0.5 (E0.5). All experimental procedures were  
2 performed in accordance with the University of Pittsburgh Institutional Animal Care and  
3 Use Committee guidelines (IACUC protocol #17091432), which adheres to the NIH Guide  
4 for the Care and Use of Laboratory Animals.

5 We harvested two kidneys at E14.5 and generated a single cell suspension using 0.05%  
6 trypsin at 37°C for 10 minutes. Kidneys were mechanically dissociated with pipetting at 5  
7 and 10 min. 3% fetal calf serum in PBS was added to halt the trypsin. The cell suspension  
8 was filtered using a 40  $\mu$ m filter and pelleted. The cells were resuspended in 90% FCS in  
9 DMSO and frozen, prior to shipment to GENEWIZ Inc. Single-cell library preparation and  
10 sequencing was performed by GENEWIZ Inc. using the 10X Genomics Inc. Chromium 3'  
11 Single Cell v2 library preparation kit. Cells exhibited high viability after freezing and thaw-  
12 ing (>90%).

### 13 **Data processing, quality control, and normalization**

#### 14 Alignment and read counting

15 Sequencing data was processed using the cellranger count pipeline of the Cell Ranger  
16 software (version 2.2.0) ([www.10xgenomics.com](http://www.10xgenomics.com)) to perform alignments and yield bar-  
17 code and UMI counts, such that the cell detection algorithms are bypassed and counts  
18 for 10,000 cells are returned (force-cells=10000 option). The mouse reference genome  
19 (GRCm38.p4) and transcript annotations from Ensembl (version 84) were used [96].

#### 20 Quality Control

21 The Bioconductor [97] R package DropletUtils [98, 99] was used to detect and remove  
22 empty droplets with default parameters at an FDR of 0.01, yielding a total of 5,887 non-  
23 empty droplets. Multiple quality control (QC) metrics were calculated using the R package  
24 scater [100] and cells with at least 1000 detected features, and percentage of mitochon-  
25 drial counts less than 3 times the median absolute deviation (MAD) from the median value  
26 were considered, resulting in a total of 4,402 cells. We excluded putative doublets as the  
27 top 5% cells ranked by the hybrid score from the R package scds [101], further filtering  
28 out 220 droplets. Finally, only genes with at least three or more counts in at least three



1 samples were considered, yielding a digital gene expression matrix comprising 11,155  
2 genes in 4,183 cells/droplets.

### 3 Normalization

4 We normalized the data using size factors calculated using the deconvolution method  
5 implemented in the computeSumFactors function in the R package scran [102] after per-  
6 forming clustering using the quickcluster function on endogenous features with an aver-  
7 age count  $\geq 0.1$ , (min.mean=0.1 option) yielding log-transformed normalized expression  
8 data. Feature selection and dimension reduction were performed using scran procedures.  
9 Briefly, we fit a mean-variance trend to the gene variances using the trendVar function  
10 and identified the biological component of the total variance with decomposeVar. All  
11 genes with an FDR  $< 0.01$  and proportion of biological variance of at least 25% are con-  
12 sidered as highly variable genes (HVG). Principal component analysis (PCA) was then  
13 performed using denoisePCA and two-dimensional representation was then derived us-  
14 ing runTSNE.

### 15 **Identification of major structural components of the kidney**

16 Cells were grouped into clusters using the scran R package by building a shared k-near-  
17 est-neighbors graph using buildSNNGraph (with use.dimred=PCA and k=25 options), fol-  
18 lowed by clustering with the Walktrap community finding algorithm as implemented in the  
19 igraph package (<https://igraph.org>), cutting the graph at 10 clusters. We used the expres-  
20 sion of a curated list of marker genes for major components of the developing kidney (see  
21 **Figure 1c**) to assign cluster labels. Cluster-specific markers were derived using the find-  
22 Markers function (**Supplemental Table 1**). We note that at this resolution tubular distal  
23 cells were grouped in the mixed/differentiating group; specific analysis of nephron pro-  
24 genitor descendant cell types then revealed distinct groups of distal vs. proximal tubular  
25 cells (see below).

### 26 **Nephron progenitor and descendant cell types**

#### 27 Selecting and characterizing NP lineage cells

28 Focusing on nephron progenitor and descendant cell types (termed “nephron-progenitor”,  
29 “mixed/differentiating” (at that point containing “distal\_tubular” cells as well) , “podocytes

1 and “proximal\_tubular” in **Figure 1**) and requiring expression of each gene with at least  
2 three counts in three cells yielded a gene expression matrix of 9,611 genes across 1,273  
3 cells. Following the same procedure as before we derived a low-dimensional representa-  
4 tion and identified six clusters of cells, corresponding to two types of nephron progenitor  
5 cells (“self-renew” and “primed”), “mixed/differentiating” cells as well as distal tubular cells  
6 and proximal tubular cells (**Figure 2**). Cluster-specific marker genes were derived as  
7 before and are reported in **Supplemental Table 2**. Enrichment analysis for Gene Ontol-  
8 ogy terms enriched between “self-renew” and “primed” and between “primed” and  
9 “mixed/differentiating” (**Figures 3b and 3c, Supplemental Tables 3 - 5**) were performed  
10 using the topGO function of the limma Bioconductor package [103] with default parame-  
11 ters. We also used SAVER [104] to impute gene expression values across this set of  
12 cells, which we then utilized in pseudotime-related analyses described below.

### 13 Pseudotime Analysis of NP cells

14 Pseudotime analysis was performed using slingshot [105], using cluster labels and prin-  
15 cipal components derived as described above (via the clusterLabels and reducedDim op-  
16 tions). This recovered three lineages (to podocytes, distal-, and proximal tubular cells),  
17 with cells in “self-renew”, “primed” and early “differentiating/mixed” being shared (see  
18 **Supplemental Figure 2**).

19 Next, we fitted a multinomial log-linear model (using the nnet package [106]) relating  
20 pseudotime with the annotated clusters. For cells with more than one annotated lineage  
21 (in the “self-renew”, “primed” and early “differentiating” clusters) lineage-pseudotimes  
22 from slingshot were averaged. This enabled us to define *NP-cells* as cells with annotated  
23 pseudotime less than the (pseudo)timepoint between “primed” and “differentiating” where  
24 the probability of the “primed” cluster has declined to 50% (i.e., 50% probability for “dif-  
25 ferentiating”). These cells contain all “self-renew” cells, 28 “differentiating” cells and all but  
26 15 “primed” cells and were used in subsequent pseudotime analyses comparing self-  
27 renewing and differentiating cells.

28 We then applied generalized additive models, as implemented in the mgcv package [107],  
29 to screen for pseudotime-associated genes (**Figure 3g**) by modeling gene expression as  
30 a smooth function of pseudotime. Focusing on high-quality pseudotime-associated genes

1 (FWER<1% modeling significance, plus highly-expressed and with an absolute spearman  
2 correlation of gene expression with pseudotime larger than 0.4) yielded 168 genes with  
3 overall decreasing expression across pseudotime (down-regulated), and 399 with in-  
4 creasing expression (up-regulated). Gene sets are reported in **Supplemental Table 6**.  
5 We then used MsigDB (v7.0) [47] and hypergeometric tests to screen for annotated gene  
6 sets enriched for up- or down-regulated genes, focusing on Gene Ontology and Hallmark  
7 gene sets (**Supplemental Table 7**). Finally we screened for regulatory modules in time-  
8 varying genes using SCENIC [49], where we used default options including GENIE3 for  
9 [108] network inference (see **Figure 3**, and **Supplemental Table 8** lists the modules we  
10 recovered).

### 11 Immunohistochemical staining

12 Kidneys dissected from embryonic day 14.5 (E14.5) and postnatal day 0 (P0) mice were  
13 fixed overnight in 4% paraformaldehyde, embedded in paraffin and sectioned at 4  $\mu$ m.  
14 After deparaffinization, rehydration, and permeabilization in PBS-Tween (PBS-T), antigen  
15 retrieval was performed by boiling the slides in 10 mM sodium citrate pH 6.0 buffer for 30  
16 min. Next, sections were blocked in 3% bovine serum albumin (BSA) and incubated over-  
17 night with antibodies recognizing Birc5 (#2808, Cell Signaling Technology, Danvers, MA,  
18 USA), Cyclin D1 (#2978, Cell Signaling) and Neural cell adhesion molecule (C9672,  
19 Sigma-Aldrich, St. Louis, MO, USA) at the dilutions recommended by the manufactures.  
20 On the next day, sections were washed with PBS-T, incubated with secondary antibodies  
21 at the dilution of 1:200, washed again with PBS-T, and mounted in Fluoro Gel with  
22 DABCO (Electron Microscopy Science, Hatfield, PA) before being visualized with a Leica  
23 DM2500 microscope and photographed with a Leica DFC 7000T camera using LAS X  
24 software (Leica, Buffalo Grove, IL, USA). Goat anti-rabbit 594 (#111-515-047) and don-  
25 key anti-mouse 488 (#715-545-151) antibodies were purchased from Jackson Inmmu-  
26 noResearch Laboratories (West Grove, PA, USA).

### 27 In situ hybridization

28 Kidneys were harvested from P0 pups, fixed in 4% paraformaldehyde overnight, treated  
29 with 30% sucrose/PBS and embedded in Tissue-Tek Optimal Cutting Temperature

1 Compound (OCT; Sakura, Torrance, CA, USA). *In situ* hybridization was conducted on  
2 10  $\mu\text{m}$  cryosections as described [109]. To generate sense and antisense probes, plas-  
3 mids were linearized and transcribed as follows: *pGEM<sup>®</sup>-T Easy-RSPO1-SacII/SP6* and  
4 *pGEM<sup>®</sup>-T Easy-RSPO1-Sal/T7*.

### 5 **Reproducibility and data availability**

6 Computer code used for data processing and data analysis is available on github  
7 ([https://github.com/kostkalab/wksc\\_manuscript](https://github.com/kostkalab/wksc_manuscript)). Single cell RNA sequencing data is  
8 available on GEO (GEO identifier to be determined)

### 9 **ACKNOWLEDGEMENTS**

10 This work was supported by NIH grants to D Kostka (NIGMS GM115836) and J. Ho  
11 (NIDDK DK103776). D. M. Cerqueira was supported by Nephrotic Syndrome Study Net-  
12 work (NEPTUNE) Career Development Award and Children’s Hospital of Pittsburgh Re-  
13 search Advisory Council Postdoctoral Fellowship. A. Clugston was supported by NIDDK  
14 T32 (DK061296) Institutional National Research Service Award.

### 15 **AUTHOR CONTRIBUTIONS**

16 A. Bais and A. Clugston designed experiments and analyzed data; D. M. Cerqueira per-  
17 formed experiments and revised the paper; J. Ho and D. Kostka designed experiments,  
18 analyzed the data and wrote the paper. All authors reviewed, revised, and approved the  
19 paper prior to submission.

### 20 **ADDITIONAL INFORMATION**

21 The authors declare no competing interests.

## 1 REFERENCES

- 2 1. Capone, V.P., et al., *Genetics of Congenital Anomalies of the Kidney and Urinary*  
3 *Tract: The Current State of Play*. International Journal of Molecular Sciences,  
4 2017. **18**(4): p. 796.
- 5 2. Yosypiv, I.V., *Congenital anomalies of the kidney and urinary tract: a genetic*  
6 *disorder?* International journal of nephrology, 2012. **2012**: p. 909083.
- 7 3. Keller, G., et al., *Nephron number in patients with primary hypertension*. N Engl J  
8 Med, 2003. **348**(2): p. 101-8.
- 9 4. Hoy, W.E., et al., *Reduced nephron number and glomerulomegaly in Australian*  
10 *Aborigines: a group at high risk for renal disease and hypertension*. Kidney Int,  
11 2006. **70**(1): p. 104-10.
- 12 5. Humphreys, B.D., *Mechanisms of Renal Fibrosis*. Annu Rev Physiol, 2018. **80**: p.  
13 309-326.
- 14 6. Coresh, J., et al., *Prevalence of chronic kidney disease in the United States*. JAMA,  
15 2007. **298**(17): p. 2038-47.
- 16 7. Boyle, S., et al., *Fate mapping using Cited1-CreERT2 mice demonstrates that the*  
17 *cap mesenchyme contains self-renewing progenitor cells and gives rise*  
18 *exclusively to nephronic epithelia*. Dev Biol, 2008. **313**(1): p. 234-45.
- 19 8. Kobayashi, A., et al., *Six2 defines and regulates a multipotent self-renewing*  
20 *nephron progenitor population throughout mammalian kidney development*. Cell  
21 Stem Cell, 2008. **3**(2): p. 169-81.
- 22 9. Little, M.H. and A.P. McMahon, *Mammalian kidney development: principles,*  
23 *progress, and projections*. Cold Spring Harb Perspect Biol, 2012. **4**(5).
- 24 10. Brown, A.C., et al., *FGF/EGF signaling regulates the renewal of early nephron*  
25 *progenitors during embryonic development*. Development, 2011. **138**(23): p. 5099-  
26 112.
- 27 11. Barak, H., et al., *FGF9 and FGF20 maintain the stemness of nephron progenitors*  
28 *in mice and man*. Dev Cell, 2012. **22**(6): p. 1191-207.
- 29 12. Muthukrishnan, S.D., et al., *Concurrent BMP7 and FGF9 signalling governs AP-1*  
30 *function to promote self-renewal of nephron progenitor cells*. Nat Commun, 2015.  
31 **6**: p. 10027.
- 32 13. Di Giovanni, V., et al., *Fibroblast growth factor receptor-Frs2alpha signaling is*  
33 *critical for nephron progenitors*. Dev Biol, 2015. **400**(1): p. 82-93.
- 34 14. Blank, U., et al., *BMP7 promotes proliferation of nephron progenitor cells via a*  
35 *JNK-dependent mechanism*. Development, 2009. **136**(21): p. 3557-66.
- 36 15. Brown, A.C., et al., *Role for compartmentalization in nephron progenitor*  
37 *differentiation*. Proc Natl Acad Sci U S A, 2013. **110**(12): p. 4640-5.
- 38 16. Karner, C.M., et al., *Canonical Wnt9b signaling balances progenitor cell expansion*  
39 *and differentiation during kidney development*. Development, 2011. **138**(7): p.  
40 1247-57.
- 41 17. Park, J.S., et al., *Six2 and Wnt regulate self-renewal and commitment of nephron*  
42 *progenitors through shared gene regulatory networks*. Dev Cell, 2012. **23**(3): p.  
43 637-51.
- 44 18. Majumdar, A., et al., *Wnt11 and Ret/Gdnf pathways cooperate in regulating*  
45 *ureteric branching during metanephric kidney development*. Development, 2003.  
46 **130**(14): p. 3175-85.



- 1 19. Dressler, G.R., *The cellular basis of kidney development*. Annu Rev Cell Dev Biol, 2006. **22**: p. 509-29.
- 2
- 3 20. Schell, C., N. Wanner, and T.B. Huber, *Glomerular development--shaping the*  
4 *multi-cellular filtration unit*. Semin Cell Dev Biol, 2014. **36**: p. 39-49.
- 5 21. Lindahl, P., et al., *Paracrine PDGF-B/PDGF-Rbeta signaling controls mesangial*  
6 *cell development in kidney glomeruli*. Development, 1998. **125**(17): p. 3313-22.
- 7 22. Betsholtz, C., et al., *Role of platelet-derived growth factor in mesangium*  
8 *development and vasculopathies: lessons from platelet-derived growth factor and*  
9 *platelet-derived growth factor receptor mutations in mice*. Curr Opin Nephrol  
10 Hypertens, 2004. **13**(1): p. 45-52.
- 11 23. Robert, B., X. Zhao, and D.R. Abrahamson, *Coexpression of neuropilin-1, Flk1,*  
12 *and VEGF(164) in developing and mature mouse kidney glomeruli*. Am J Physiol  
13 Renal Physiol, 2000. **279**(2): p. F275-82.
- 14 24. Abrahamson, D.R., *Glomerulogenesis in the developing kidney*. Semin Nephrol,  
15 1991. **11**(4): p. 375-89.
- 16 25. Adam, M., A.S. Potter, and S.S. Potter, *Psychrophilic proteases dramatically*  
17 *reduce single-cell RNA-seq artifacts: a molecular atlas of kidney development*.  
18 Development, 2017. **144**(19): p. 3625-3632.
- 19 26. Brunskill, E.W., et al., *Single cell dissection of early kidney development:*  
20 *multilineage priming*. Development, 2014. **141**(15): p. 3093-101.
- 21 27. Magella, B., et al., *Cross-platform single cell analysis of kidney development*  
22 *shows stromal cells express Gdnf*. Dev Biol, 2018. **434**(1): p. 36-47.
- 23 28. Combes, A.N., et al., *Single cell analysis of the developing mouse kidney provides*  
24 *deeper insight into marker gene expression and ligand-receptor crosstalk*.  
25 Development, 2019. **146**(12).
- 26 29. Combes, A.N., et al., *Correction: Single cell analysis of the developing mouse*  
27 *kidney provides deeper insight into marker gene expression and ligand-receptor*  
28 *crosstalk (doi:10.1242/dev.178673)*. Development, 2019. **146**(13).
- 29 30. England, A.R., et al., *Identification and characterization of cellular heterogeneity*  
30 *within the developing renal interstitium*. Development, 2020. **147**(15).
- 31 31. Menon, R., et al., *Single-cell analysis of progenitor cell dynamics and lineage*  
32 *specification in the human fetal kidney*. Development, 2018. **145**(16).
- 33 32. Wang, P., et al., *Dissecting the Global Dynamic Molecular Profiles of Human Fetal*  
34 *Kidney Development by Single-Cell RNA Sequencing*. Cell Rep, 2018. **24**(13): p.  
35 3554-3567 e3.
- 36 33. Lindstrom, N.O., et al., *Conserved and Divergent Features of Mesenchymal*  
37 *Progenitor Cell Types within the Cortical Nephrogenic Niche of the Human and*  
38 *Mouse Kidney*. J Am Soc Nephrol, 2018.
- 39 34. Brown, A.C., S.D. Muthukrishnan, and L. Oxburgh, *A synthetic niche for nephron*  
40 *progenitor cells*. Dev Cell, 2015. **34**(2): p. 229-41.
- 41 35. Tanigawa, S., et al., *Selective In Vitro Propagation of Nephron Progenitors Derived*  
42 *from Embryos and Pluripotent Stem Cells*. Cell Rep, 2016. **15**(4): p. 801-813.
- 43 36. Li, Z., et al., *3D Culture Supports Long-Term Expansion of Mouse and Human*  
44 *Nephrogenic Progenitors*. Cell Stem Cell, 2016. **19**(4): p. 516-529.

- 1 37. Takasato, M. and M.H. Little, *A strategy for generating kidney organoids: Recapitulating the development in human pluripotent stem cells*. *Dev Biol*, 2016. 2 **420**(2): p. 210-220.
- 3
- 4 38. Morizane, R. and J.V. Bonventre, *Generation of nephron progenitor cells and kidney organoids from human pluripotent stem cells*. *Nat Protoc*, 2017. **12**(1): p. 5 195-207.
- 6
- 7 39. Hartman, H.A., H.L. Lai, and L.T. Patterson, *Cessation of renal morphogenesis in mice*. *Dev Biol*, 2007. **310**(2): p. 379-87.
- 8
- 9 40. Marlier, A. and T. Gilbert, *Expression of retinoic acid-synthesizing and -metabolizing enzymes during nephrogenesis in the rat*. *Gene Expr Patterns*, 2004. 10 **5**(2): p. 179-85.
- 11
- 12 41. Harding, S.D., et al., *The GUDMAP database--an online resource for genitourinary research*. *Development*, 2011. **138**(13): p. 2845-53.
- 13
- 14 42. Diez-Roux, G., et al., *A high-resolution anatomical atlas of the transcriptome in the mouse embryo*. *PLoS Biol*, 2011. **9**(1): p. e1000582.
- 15
- 16 43. Takemoto, M., et al., *Large-scale identification of genes implicated in kidney glomerulus development and function*. *EMBO J*, 2006. **25**(5): p. 1160-74.
- 17
- 18 44. Lee, J.W., C.L. Chou, and M.A. Knepper, *Deep Sequencing in Microdissected Renal Tubules Identifies Nephron Segment-Specific Transcriptomes*. *J Am Soc Nephrol*, 2015. **26**(11): p. 2669-77.
- 19
- 20
- 21 45. Short, K.M., et al., *Global quantification of tissue dynamics in the developing mouse kidney*. *Dev Cell*, 2014. **29**(2): p. 188-202.
- 22
- 23 46. Lindstrom, N.O., et al., *Conserved and Divergent Molecular and Anatomic Features of Human and Mouse Nephron Patterning*. *J Am Soc Nephrol*, 2018. 24 **29**(3): p. 825-840.
- 25
- 26 47. Liberzon, A., et al., *The Molecular Signatures Database (MSigDB) hallmark gene set collection*. *Cell Syst*, 2015. **1**(6): p. 417-425.
- 27
- 28 48. Liberzon, A., et al., *Molecular signatures database (MSigDB) 3.0*. *Bioinformatics*, 29 **27**(12): p. 1739-40.
- 30
- 31 49. Aibar, S., et al., *SCENIC: single-cell regulatory network inference and clustering*. *Nat Methods*, 2017. **14**(11): p. 1083-1086.
- 32
- 33 50. Chen, P.M., et al., *c-Maf regulates pluripotency genes, proliferation/self-renewal, and lineage commitment in ROS-mediated senescence of human mesenchymal stem cells*. *Oncotarget*, 2015. **6**(34): p. 35404-18.
- 34
- 35 51. Julian, L.M. and A. Blais, *Transcriptional control of stem cell fate by E2Fs and pocket proteins*. *Front Genet*, 2015. **6**: p. 161.
- 36
- 37 52. Hu, T., et al., *Concomitant inactivation of Rb and E2f8 in hematopoietic stem cells synergizes to induce severe anemia*. *Blood*, 2012. **119**(19): p. 4532-42.
- 38
- 39 53. Jolly, L.A., et al., *HCFC1 loss-of-function mutations disrupt neuronal and neural progenitor cells of the developing brain*. *Hum Mol Genet*, 2015. **24**(12): p. 3335-47.
- 40
- 41
- 42 54. Chen, Y.H., M.C. Hung, and L.Y. Li, *EZH2: a pivotal regulator in controlling cell differentiation*. *Am J Transl Res*, 2012. **4**(4): p. 364-75.
- 43
- 44 55. Papetti, M. and L.H. Augenlicht, *MYBL2, a link between proliferation and differentiation in maturing colon epithelial cells*. *J Cell Physiol*, 2011. **226**(3): p. 45 785-91.
- 46



- 1 56. Georgas, K., et al., *Analysis of early nephron patterning reveals a role for distal RV*  
2 *proliferation in fusion to the ureteric tip via a cap mesenchyme-derived connecting*  
3 *segment*. Dev Biol, 2009. **332**(2): p. 273-86.
- 4 57. Bariety, J., et al., *Parietal podocytes in normal human glomeruli*. J Am Soc  
5 Nephrol, 2006. **17**(10): p. 2770-80.
- 6 58. Ohse, T., et al., *De novo expression of podocyte proteins in parietal epithelial cells*  
7 *during experimental glomerular disease*. Am J Physiol Renal Physiol, 2010.  
8 **298**(3): p. F702-11.
- 9 59. Fan, X., et al., *Inhibitory effects of Robo2 on nephrin: a crosstalk between positive*  
10 *and negative signals regulating podocyte structure*. Cell Rep, 2012. **2**(1): p. 52-61.
- 11 60. Upadhyay, G., *Emerging Role of Lymphocyte Antigen-6 Family of Genes in Cancer*  
12 *and Immune Cells*. Front Immunol, 2019. **10**: p. 819.
- 13 61. Li, Y., et al., *p53 Enables metabolic fitness and self-renewal of nephron progenitor*  
14 *cells*. Development, 2015. **142**(7): p. 1228-41.
- 15 62. Wu, H., et al., *Proximal Tubule Translational Profiling during Kidney Fibrosis*  
16 *Reveals Proinflammatory and Long Noncoding RNA Expression Patterns with*  
17 *Sexual Dimorphism*. J Am Soc Nephrol, 2020. **31**(1): p. 23-38.
- 18 63. Ransick, A., et al., *Single-Cell Profiling Reveals Sex, Lineage, and Regional*  
19 *Diversity in the Mouse Kidney*. Dev Cell, 2019. **51**(3): p. 399-413 e7.
- 20 64. Combes, A.N., et al., *Single-cell analysis reveals congruence between kidney*  
21 *organoids and human fetal kidney*. Genome Med, 2019. **11**(1): p. 3.
- 22 65. O'Brien, L.L., et al., *Wnt11 directs nephron progenitor polarity and motile behavior*  
23 *ultimately determining nephron endowment*. Elife, 2018. **7**.
- 24 66. Combes, A.N., et al., *Cap mesenchyme cell swarming during kidney development*  
25 *is influenced by attraction, repulsion, and adhesion to the ureteric tip*. Dev Biol,  
26 2016. **418**(2): p. 297-306.
- 27 67. Lawlor, K.T., et al., *Nephron progenitor commitment is a stochastic process*  
28 *influenced by cell migration*. Elife, 2019. **8**.
- 29 68. Mugford, J.W., et al., *High-resolution gene expression analysis of the developing*  
30 *mouse kidney defines novel cellular compartments within the nephron progenitor*  
31 *population*. Dev Biol, 2009. **333**(2): p. 312-23.
- 32 69. Lindstrom, N.O., et al., *Conserved and Divergent Features of Mesenchymal*  
33 *Progenitor Cell Types within the Cortical Nephrogenic Niche of the Human and*  
34 *Mouse Kidney*. J Am Soc Nephrol, 2018. **29**(3): p. 806-824.
- 35 70. Thomson, R.B., et al., *Role of PDZK1 in membrane expression of renal brush*  
36 *border ion exchangers*. Proc Natl Acad Sci U S A, 2005. **102**(37): p. 13331-6.
- 37 71. Anzai, N., et al., *The multivalent PDZ domain-containing protein PDZK1 regulates*  
38 *transport activity of renal urate-anion exchanger URAT1 via its C terminus*. J Biol  
39 Chem, 2004. **279**(44): p. 45942-50.
- 40 72. Sayer, J.A., *Progress in Understanding the Genetics of Calcium-Containing*  
41 *Nephrolithiasis*. J Am Soc Nephrol, 2017. **28**(3): p. 748-759.
- 42 73. Fearn, A., et al., *Clinical, biochemical, and pathophysiological analysis of*  
43 *SLC34A1 mutations*. Physiol Rep, 2018. **6**(12): p. e13715.
- 44 74. Chau, H., et al., *Renal calcification in mice homozygous for the disrupted type IIa*  
45 *Na/Pi cotransporter gene Npt2*. J Bone Miner Res, 2003. **18**(4): p. 644-57.

- 1 75. AbouAlaiwi, W.A., et al., *Endothelial cells from humans and mice with polycystic*  
2 *kidney disease are characterized by polyploidy and chromosome segregation*  
3 *defects through survivin down-regulation.* Hum Mol Genet, 2011. **20**(2): p. 354-67.
- 4 76. Chen, J., et al., *Survivin mediates renal proximal tubule recovery from AKI.* J Am  
5 Soc Nephrol, 2013. **24**(12): p. 2023-33.
- 6 77. Zhou, D., et al., *Tubule-specific ablation of endogenous beta-catenin aggravates*  
7 *acute kidney injury in mice.* Kidney Int, 2012. **82**(5): p. 537-47.
- 8 78. Byun, S.S., et al., *Expression of survivin in renal cell carcinomas: association with*  
9 *pathologic features and clinical outcome.* Urology, 2007. **69**(1): p. 34-7.
- 10 79. Parker, A.S., et al., *Comparison of digital image analysis versus visual assessment*  
11 *to assess survivin expression as an independent predictor of survival for patients*  
12 *with clear cell renal cell carcinoma.* Hum Pathol, 2008. **39**(8): p. 1176-84.
- 13 80. Kobayashi, K., et al., *Expression of a murine homologue of the inhibitor of*  
14 *apoptosis protein is related to cell proliferation.* Proc Natl Acad Sci U S A, 1999.  
15 **96**(4): p. 1457-62.
- 16 81. Li, F. and D.C. Altieri, *Transcriptional analysis of human survivin gene expression.*  
17 Biochem J, 1999. **344 Pt 2**: p. 305-11.
- 18 82. Li, F., et al., *Control of apoptosis and mitotic spindle checkpoint by survivin.* Nature,  
19 1998. **396**(6711): p. 580-4.
- 20 83. Zhao, J., et al., *The ubiquitin-proteasome pathway regulates survivin degradation*  
21 *in a cell cycle-dependent manner.* J Cell Sci, 2000. **113 Pt 23**: p. 4363-71.
- 22 84. Uren, A.G., et al., *Survivin and the inner centromere protein INCENP show similar*  
23 *cell-cycle localization and gene knockout phenotype.* Curr Biol, 2000. **10**(21): p.  
24 1319-28.
- 25 85. Lens, S.M., et al., *Survivin is required for a sustained spindle checkpoint arrest in*  
26 *response to lack of tension.* EMBO J, 2003. **22**(12): p. 2934-47.
- 27 86. Carvalho, A., et al., *Survivin is required for stable checkpoint activation in taxol-*  
28 *treated HeLa cells.* J Cell Sci, 2003. **116**(Pt 14): p. 2987-98.
- 29 87. Rajagopalan, S. and M.K. Balasubramanian, *Schizosaccharomyces pombe Bir1p,*  
30 *a nuclear protein that localizes to kinetochores and the spindle midzone, is*  
31 *essential for chromosome condensation and spindle elongation during mitosis.*  
32 Genetics, 2002. **160**(2): p. 445-56.
- 33 88. Yue, Z., et al., *Deconstructing Survivin: comprehensive genetic analysis of Survivin*  
34 *function by conditional knockout in a vertebrate cell line.* J Cell Biol, 2008. **183**(2):  
35 p. 279-96.
- 36 89. Speliotes, E.K., et al., *The survivin-like C. elegans BIR-1 protein acts with the*  
37 *Aurora-like kinase AIR-2 to affect chromosomes and the spindle midzone.* Mol  
38 Cell, 2000. **6**(2): p. 211-23.
- 39 90. Yang, D., A. Welm, and J.M. Bishop, *Cell division and cell survival in the absence*  
40 *of survivin.* Proc Natl Acad Sci U S A, 2004. **101**(42): p. 15100-5.
- 41 91. Marusawa, H., et al., *HBXIP functions as a cofactor of survivin in apoptosis*  
42 *suppression.* EMBO J, 2003. **22**(11): p. 2729-40.
- 43 92. Dohi, T., et al., *An IAP-IAP complex inhibits apoptosis.* J Biol Chem, 2004. **279**(33):  
44 p. 34087-90.
- 45 93. Mita, A.C., et al., *Survivin: key regulator of mitosis and apoptosis and novel target*  
46 *for cancer therapeutics.* Clin Cancer Res, 2008. **14**(16): p. 5000-5.

- 1 94. Wheatley, S.P. and D.C. Altieri, *Survivin at a glance*. J Cell Sci, 2019. **132**(7).
- 2 95. Chang, C.H. and J.A. Davies, *In developing mouse kidneys, orientation of loop of*  
3 *Henle growth is adaptive and guided by long-range cues from medullary collecting*  
4 *ducts*. J Anat, 2019. **235**(2): p. 262-270.
- 5 96. Zerbino, D.R., et al., *Ensembl 2018*. Nucleic Acids Res, 2018. **46**(D1): p. D754-  
6 D761.
- 7 97. Huber, W., et al., *Orchestrating high-throughput genomic analysis with*  
8 *Bioconductor*. Nat Methods, 2015. **12**(2): p. 115-21.
- 9 98. Lun, A.T.L., et al., *EmptyDrops: distinguishing cells from empty droplets in droplet-*  
10 *based single-cell RNA sequencing data*. Genome Biol, 2019. **20**(1): p. 63.
- 11 99. Griffiths, J.A., et al., *Detection and removal of barcode swapping in single-cell*  
12 *RNA-seq data*. Nat Commun, 2018. **9**(1): p. 2667.
- 13 100. McCarthy, D.J., et al., *Scater: pre-processing, quality control, normalization and*  
14 *visualization of single-cell RNA-seq data in R*. Bioinformatics, 2017. **33**(8): p. 1179-  
15 1186.
- 16 101. Bais, A.S. and D. Kostka, *scds: computational annotation of doublets in single-cell*  
17 *RNA sequencing data*. Bioinformatics, 2020. **36**(4): p. 1150-1158.
- 18 102. Lun, A.T., D.J. McCarthy, and J.C. Marioni, *A step-by-step workflow for low-level*  
19 *analysis of single-cell RNA-seq data with Bioconductor*. F1000Res, 2016. **5**: p.  
20 2122.
- 21 103. Ritchie, M.E., et al., *limma powers differential expression analyses for RNA-*  
22 *sequencing and microarray studies*. Nucleic Acids Res, 2015. **43**(7): p. e47.
- 23 104. Huang, M., et al., *SAVER: gene expression recovery for single-cell RNA*  
24 *sequencing*. Nat Methods, 2018. **15**(7): p. 539-542.
- 25 105. Street, K., et al., *Slingshot: cell lineage and pseudotime inference for single-cell*  
26 *transcriptomics*. BMC Genomics, 2018. **19**(1): p. 477.
- 27 106. Venables, W.N.R., B. D, *Modern Applied Statistics with S*. Fourth ed. 2002, New  
28 York: Springer.
- 29 107. B., W.S.N.P.N.S., *Smoothing parameter and model selection for general smooth*  
30 *models (with discussion)*. Journal of the American Statistical Association, 2016.  
31 **111**: p. 1548-1575.
- 32 108. Huynh-Thu, V.A., et al., *Inferring regulatory networks from expression data using*  
33 *tree-based methods*. PLoS One, 2010. **5**(9).
- 34 109. D, W., *In Situ Hybridization: A Practical Approach*. 1992: IRL Press, Oxford  
35 University

## FIGURES

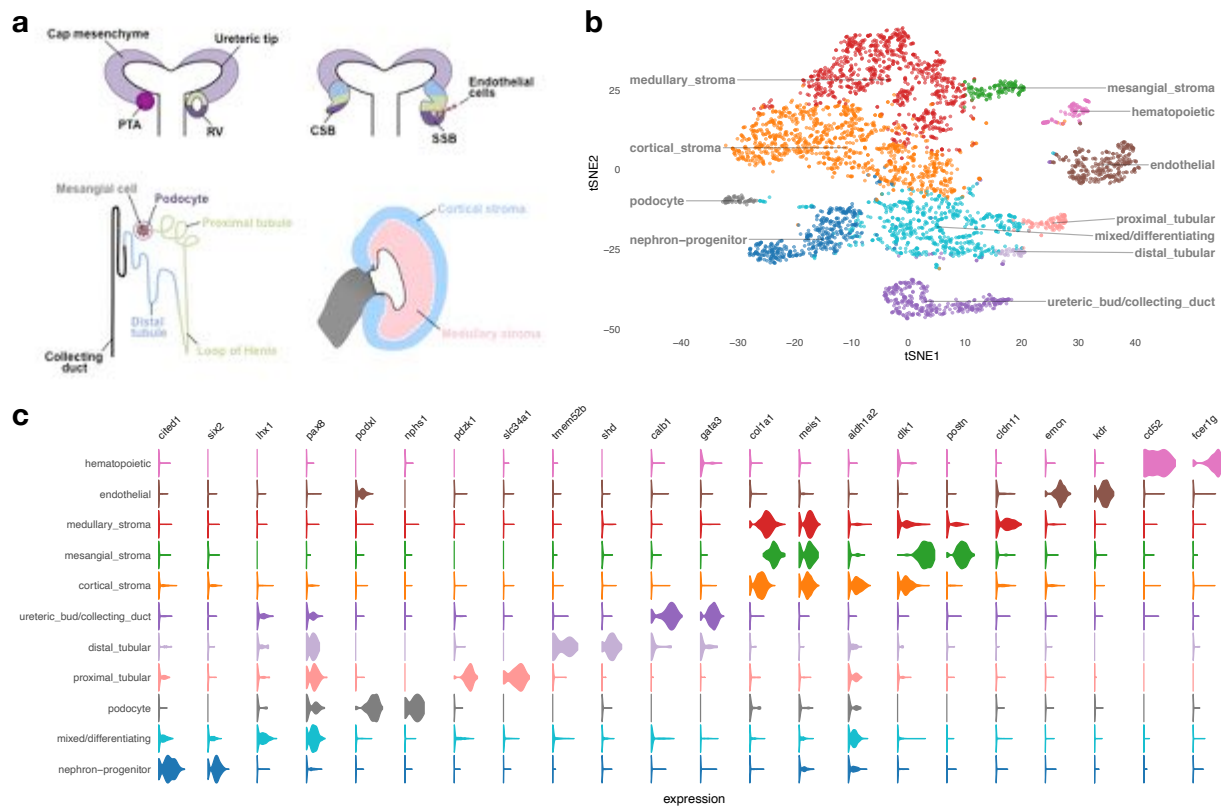

1 **Figure 1: Developing embryonic day 14.5 mouse kidney cell types. (a)** Schematic  
 2 illustration of nephron induction and patterning. In response to signals from the ureteric  
 3 bud, the metanephric mesenchyme condenses and forms a cap of nephron progenitors  
 4 (=cap mesenchyme) around the ureteric bud tips. Next, a sub-population of nephron pro-  
 5 genitors undergoes a mesenchymal to epithelial transition to form pre-tubular aggregates  
 6 (PTA), which develop sequentially into renal vesicles (RV), comma-shaped body (CSB)  
 7 and S-shaped body (SSB). Endothelial cells are attracted into the cleft of the SSB. Color-  
 8 coded map indicates the cell fate relationship of progenitor regions in SSB structure (up-  
 9 per right) and adult nephron structure (lower left). Schematic of a lateral view of the met-  
 10 anephric kidney depicting the cortical and medullary stroma (lower right). **(b)** tSNE plot  
 11 showing the eleven cell clusters in the embryonic mouse kidney, with cell clusters corre-  
 12 sponding to major components indicated by color. **(c)** Violin plots of gene expression for

- 1 known lineage-associated genes (columns), stratified by cluster (rows). Our data clearly
- 2 identifies cells from the major structural components of the developing kidney.

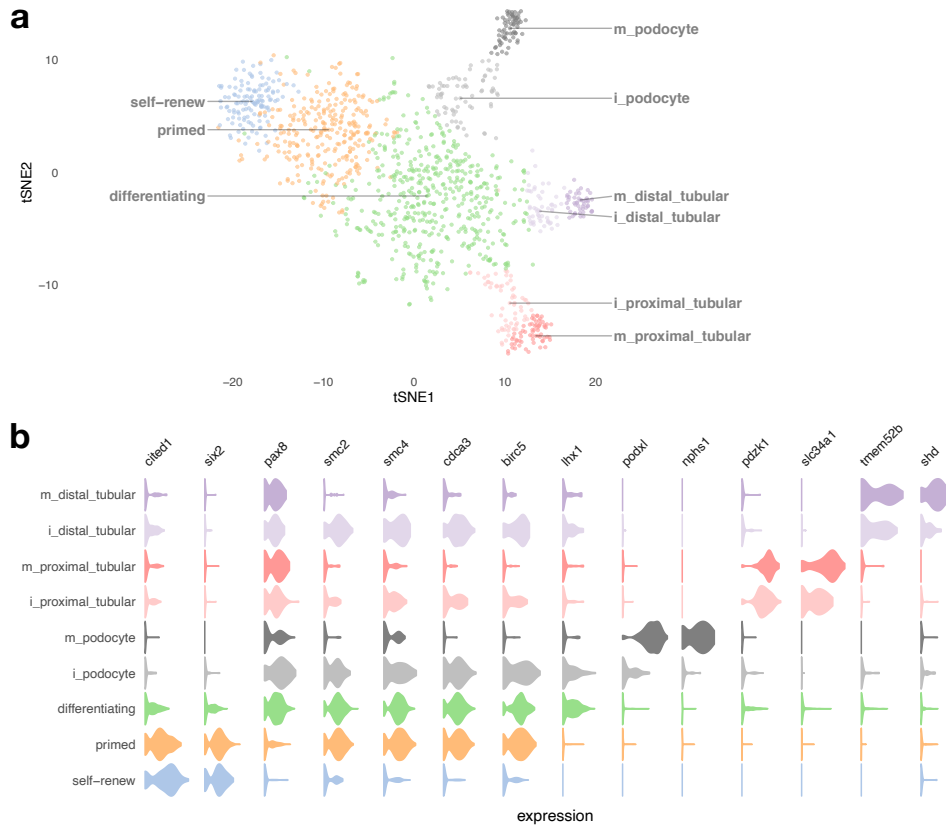

1 **Figure 2: Cell types of the nephron progenitor lineage.** Panel (a) shows a tSNE plot  
2 of NP-derived cells, with clusters corresponding to cell types annotated in colors. The  
3 prefix “i\_” indicates immature cells, while “m\_” indicates mature cells. Panel (b) shows  
4 violin plots of gene expression for known lineage-associated genes (columns), stratified  
5 by cluster (rows). We observe two types of NP cells (“self-renewing” and “primed”) and  
6 clear separation of distal and proximal tubular cells and podocytes in our data.



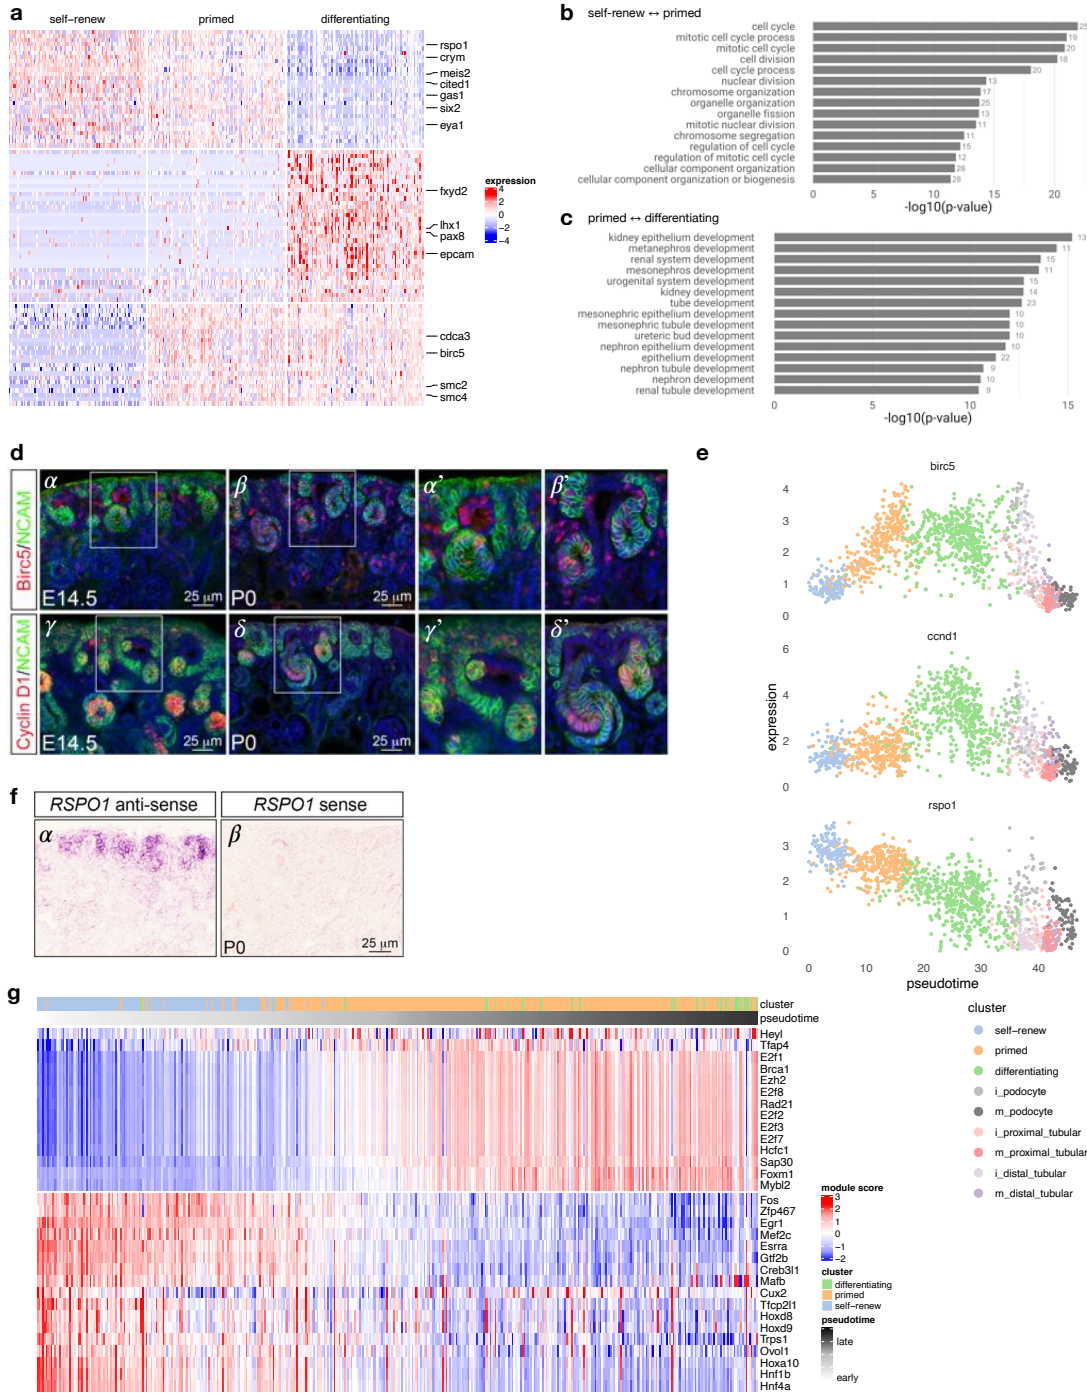

1 **Figure 3: Transcriptional signatures of self-renewing, primed and differentiating**  
 2 **nephron progenitor cells.** Panel (a) shows differentially expressed genes on a heatmap  
 3 of 100 random cells for each of the “self-renew”, “primed” and differentiating  
 4 clusters, with key genes annotated on the right. Panels (b) and (c) show the 20 most-enriched Gene  
 5 Ontology terms for genes differentially expressed between self-renewing and primed NP



1 cells, and between primed NP cells and differentiating cells, respectively. **(d)** Immunoflu-  
2 orescence on kidney sections from embryonic day 14.5 (E14.5) and postnatal day 0 (P0)  
3 mice using anti-Birc5 ( $\alpha - \beta'$ ) and anti-Cyclin D1 ( $\gamma - \delta'$ ) antibodies (red). Nephron progen-  
4 itors and their early epithelial derivatives were detected using an antibody against anti-  
5 Neural cell adhesion molecule (NCAM; green). Nuclei were counterstained with DAPI  
6 (blue). Scale bar, 25  $\mu\text{m}$ . The sub-panels  $\alpha'$ ,  $\beta'$ ,  $\gamma'$  and  $\delta'$  are close-ups of the areas indi-  
7 cated by the white boxes. **(e)** Expression of *Birc5*, *Ccnd1* and *Rspo1* across pseudotime;  
8 colors indicate cell clusters. **(f)** *In situ* hybridization on cryosections of P0 kidneys confirms  
9 the expression of *Rspo1* in nephron progenitors and their early epithelial derivatives ( $\alpha$ ).  
10 No signal was detected with sense probe hybridization ( $\beta$ ). Images are representative of  
11 three independent experiments. Scale bar 25  $\mu\text{m}$ . **(g)** Inferred regulatory module activity  
12 based on SCENIC [49] across pseudotime for predominantly self-renewing and primed  
13 nephron progenitor cells.

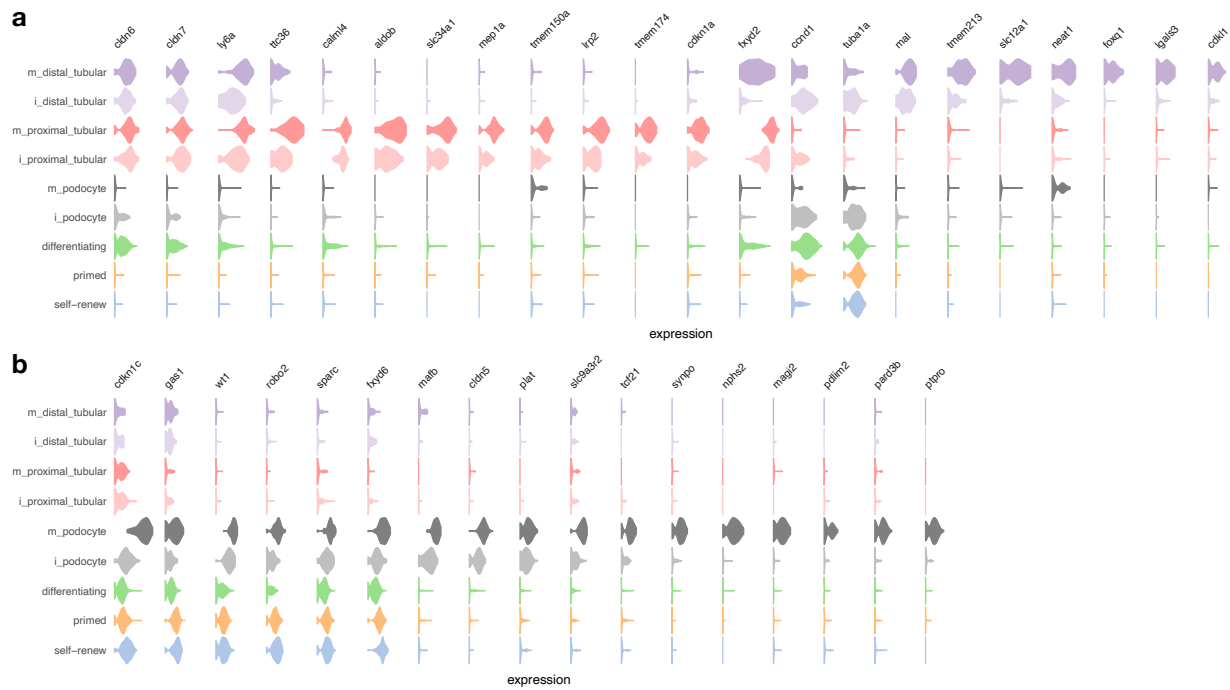

1 **Figure 4: *Transcriptional signatures of podocytes and tubular cells.*** (a) Violin plot of  
2 genes expressed in podocytes (rows are clusters and columns denote genes). (b) Same  
3 as (a), but for proximal and distal tubular cells.

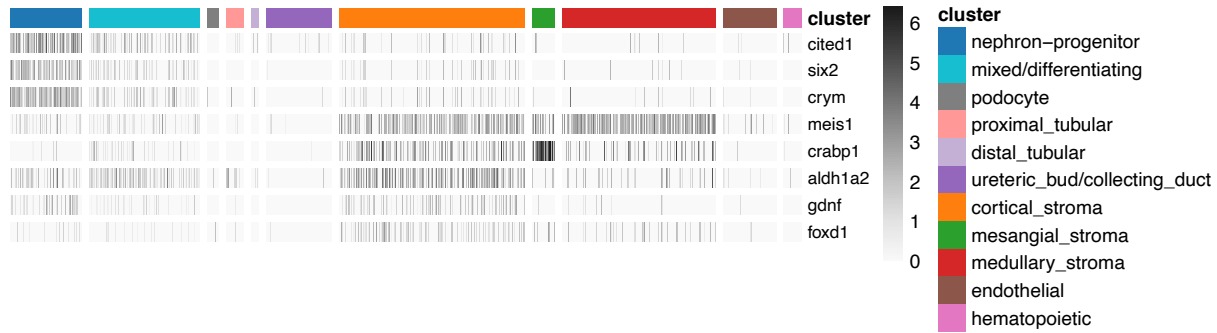

1 **Figure 5: Expression of lineage-marker genes in unexpected cell types.** Heatmap of  
2 gene expression (gray scale) of known lineage-marker genes (rows) across cells (col-  
3 umns), ordered by cell clusters (color index). We observe the expression of cap mesen-  
4 chyme markers (*Cited1*, *Six2*, *Crym*, *Gdnf*) in stromal cells and vice versa, consistent with  
5 previous reports [27].

6

1 **TABLES**

| <b>cs_gene</b> | <b>np_gene</b> | <b>#cells</b> | <b>odds_ratio</b> | <b>p_value</b> |
|----------------|----------------|---------------|-------------------|----------------|
| col1a1         | cited1         | 237           | 8.32              | 8.29E-13       |
| col1a1         | crym           | 260           | 5.87              | 1.27E-11       |
| col1a1         | gdnf           | 407           | 1.73              | 1.87E-03       |
| col1a1         | six2           | 237           | 4.71              | 3.00E-09       |
| meis1          | cited1         | 214           | 2.14              | 2.12E-04       |
| meis1          | crym           | 238           | 2.21              | 4.33E-05       |
| meis1          | gdnf           | 402           | 2.39              | 5.94E-08       |
| meis1          | six2           | 221           | 2.42              | 1.64E-05       |

2 **Table 1: Co-expression of stromal marker genes and nephron progenitor marker**  
3 **genes in cortical/stromal cells.** The cs\_gene and np\_gene columns show the corti-  
4 cal/stromal and nephron-progenitor marker genes, respectively; the #cells column shows  
5 the number of cells expressing both genes in the stromal/cortical cluster (which contains  
6 1,085 cells overall), while the odds\_ratio and p\_value columns contain odds ratio and  
7 p\_value of a corresponding Fisher exact test.

| <b>Cluster</b>     | <b><i>Calb1</i></b> | <b><i>Mal</i></b> | <b><i>Mecom</i></b> | <b><i>Wfdc2</i></b> |
|--------------------|---------------------|-------------------|---------------------|---------------------|
| i_tubular_prox     | 3.1                 | 3.1               | 3.1                 | 48.4                |
| m_tubular_prox     | 1.6                 | 1.6               | 4.7                 | 42.2                |
| i_tubular_dist     | 26.4                | 86.8              | 92.5                | 98.1                |
| m_tubular_dist     | 14.6                | 91.7              | 87.5                | 100.0               |
| ub/collecting-duct | 83.6                | 52.0              | 71.0                | 99.7                |

1 **Table 2: Ureteric bud / collecting duct lineage genes are expressed in distal tubu-**  
2 **lar cells.** Shown is the percentage of cells expressing ureteric bud / collecting duct  
3 (ub/cd) lineage marker genes *Calb1*, *Mal*, *Mecom* and *Wfdc2* for cells from immature  
4 and mature distal and proximal tubular clusters, and also from the ub/cd cluster. We see  
5 that in the tubular distal lineage, in contrast to the proximal lineage, a significant fraction  
6 of cells expresses these ub/cd marker genes.

1 **SUPPLEMENTAL MATERIAL**

2 **Supplemental Figure 1: Heatmap of marker genes that distinguish between kidney**  
3 **cell types.** Rows are genes (fifteen top-most marker genes have been selected for each  
4 cluster), and columns are cells grouped by cell types.

5 **Supplemental Figure 2: Differentiation lineages for nephron progenitor cells.** A  
6 tSNE embedding for nephron progenitor cells is shown. Differentiation lineages inferred  
7 by the slingshot R package are displayed in gray.

8 **Supplemental Figure 3: Differentially expressed genes during nephron progenitor**  
9 **cell differentiation.** Heatmap of top differentially expressed genes between annotated  
10 clusters (column labels).

11 **Supplemental Figure 4: Consistent *Birc5* expression in distal tubular cells and a**  
12 **subpopulation of cells from the ureteric bud.** Shown are tSNE plots of nephron pro-  
13 genitor derived cells and cells of the ureteric bud / collecting duct (ub/cd) cluster (see  
14 **Figure 1**). **(a)** Cell-type annotations for depicted cells. **(b)** *Birc5* expression. Arrows de-  
15 note early distal tubular cells and ub/cd cells with similar *Birc5* expression.

16 **Supplemental Figure 5: Differentially expressed genes in the podocyte and tubular**  
17 **lineages.** **(a)** Heatmap of top 100 differentially expressed genes between immature and  
18 mature podocytes and **(b)** between proximal and distal tubular cells. **(c)** Differential gene  
19 expression between immature and mature proximal tubular cells, and **(d)** between imma-  
20 ture and mature distal tubular cells.

21 **Supplemental Table 1: Marker genes that distinguish between kidney cell types.**  
22 For each cluster marker genes with an FDR < 0.05 are reported (see **Figure 1**).

23 **Supplemental Table 2: Marker genes that distinguish nephron-progenitor derived**  
24 **cell types.** For each cluster (imperfect) marker genes with an FDR < 0.05 are reported  
25 (see **Figure 2**).

1 **Supplemental Table 3: *Differentially expressed genes for self-renewing vs. primed***  
2 ***nephron progenitor cell types.*** For each comparison, differentially expressed genes  
3 (FDR < 0.1) are reported (see **Figure 3a**).

4 **Supplemental Table 4: *Differentially expressed genes for primed nephron progen-***  
5 ***itor cells vs. differentiating cells.*** Differentially expressed genes (FDR < 0.1) are re-  
6 ported (see **Figure 3a**).

7 **Supplemental Table 5: *Gene Ontology terms enriched for differentially expressed***  
8 ***genes, comparing self-renewing vs. primed nephron progenitor cells and primed***  
9 ***vs. differentiating cells.*** See **Figure 3b** and **3c**.

10 **Supplemental Table 6: *Genes associated with pseudotime across nephron progen-***  
11 ***itor cells.*** Genes associated with pseudotime are reported (FWER < 1%).

12 **Supplemental Table 7: *Gene sets enriched for genes increasing with pseudotime***  
13 ***and for genes decreasing with pseudotime across nephron progenitor cells.*** Gene  
14 sets from MSigDB for Gene Ontology (Biological Process) and Hallmark gene sets (FDR  
15 < 0.01) are reported.

16 **Supplemental Table 8: *Regulatory modules.*** Regulatory modules of genes active in  
17 the transition between self-renewing and primed nephron progenitor cells (see **Figure**  
18 **3g**).

19 **Supplemental Table 9: *Differentially expressed genes for mature vs. immature***  
20 ***nephron progenitor derived cell types.*** Differentially expressed genes (FDR < 0.1) are  
21 reported (see **Supplemental Figure 5**).

22 **Supplemental Table 10: *Differentially expressed genes for distal vs. proximal tub-***  
23 ***ular cells.*** Differentially expressed genes (FDR < 0.1) are reported (see **Supplemental**  
24 **Figure 5**).
